# Supplementary material for: SiNF-YC2 Regulates Early Maturity and Salt Tolerance in Setaria italica
Source: MDPI journal article supplement (doi:10.3390/ijms24087217), 2023-04-13
Supplement: s1 [file s1]

**Table S1** Primers used in this study

| Name of primer | Sequence (5'-3')                              | Application                                  |
|----------------|-----------------------------------------------|----------------------------------------------|
| C2-F1          | 5'-GAGAAGAAGCATCGGAAC-3'                      | Gene cloning                                 |
| C2-R1          | 5'-ACATTCACTTCAAGGGCG-3'                      |                                              |
| C2-F2          | 5'-GCTTTCGCGAGCTCGGTACCATGGACAACCAGCCGCTGC-3' | Construction of PC1300S                      |
| C2-R2          | 5'-GACTCTAGAGGATCCCCGGGTCAGAGCTCGGAGGTGC-3'   | expression vector                            |
| C2-F3          | 5'-CAGCCCAGATCACTAGTATGGACAACCAGCCGCTGC-3'    | Construction of GFP                          |
| C2-R3          | 5'-CACCATGGATCCCCGGGTCAGAGCTCGGAGGTGC-3'      | expression vector                            |
| C2-F4          | 5'-CCATGGAGGCCGAATTCATGGACAACCAGCCGCTGC-3'    | Construction of                              |
| C2-R4          | 5'-GGCCGCTGCAGGTCGACTCACTCAGAGCTCGGAGGTGC-3'  | pGBKT7- <i>SiNF-YC2</i><br>expression vector |
| C2-F5          | 5'-GCGTCGGCGTCGGAATTCAA-3'                    | Expression analysis of                       |
| C2-R5          | 5'-AGCCAGGAGCGGATGGTGAG-3'                    | qRT-PCR                                      |
| SiActin-F      | 5'-CGCATATGTGGCTCTTGACT-3'                    | Reference gene for millet                    |
| SiActin-R      | 5'-GGGCACCTAAATCTCTCTGC-3'                    | qRT-PCR                                      |
| AtActin-F      | 5'-CGTGGTGGTGCTAAGAAGAGG-3'                   | Reference gene for                           |
| AtActin-R      | 5'-GAAAGTCCCAGCTCCACAGGT-3'                   | <i>Arabidopsis</i> qRT-PCR                   |

**Table S2** cis-acting element of *SiNF-YC2* promoter

| Element         | Sequence  | Number | Function                                                           |
|-----------------|-----------|--------|--------------------------------------------------------------------|
| G-box           | TACGTG    | 2      | Light responsiveness                                               |
| G-Box           | CACGTT    | 2      | Light responsiveness                                               |
| MRE             | AACCTAA   | 1      | MYB binding site involved in light responsiveness                  |
| TCT-motif       | TCTTAC    | 1      | part of a light responsive element                                 |
| GA-motif        | ATAGATAA  | 1      | part of a light responsive element                                 |
| CGTCA-motif     | CGTCA     | 1      | MeJA responsiveness                                                |
| TGACG-motif     | TGACG     | 1      | MeJA responsiveness                                                |
| ABRE            | ACGTG     | 4      | ABA responsiveness                                                 |
| TC-rich repeats | GTTTCTTAC | 1      | Defense and stress                                                 |
| ARE             | AAACCA    | 3      | Anaerobic responsiveness                                           |
| RY-element      | CATGCATG  | 1      | cis-acting regulatory element involved in seed-specific regulation |
| CAAT-box        | CAAAT     | 22     | Enhancer regions                                                   |
| TATA-box        | TATA      | 20     | Transcription start                                                |
