# Supplementary material for: SiNF-YC2 Regulates Early Maturity and Salt Tolerance in Setaria italica
Source: MDPI journal article supplement (doi:10.3390/ijms24087217), 2023-04-13
Supplement: s1 [file s1]

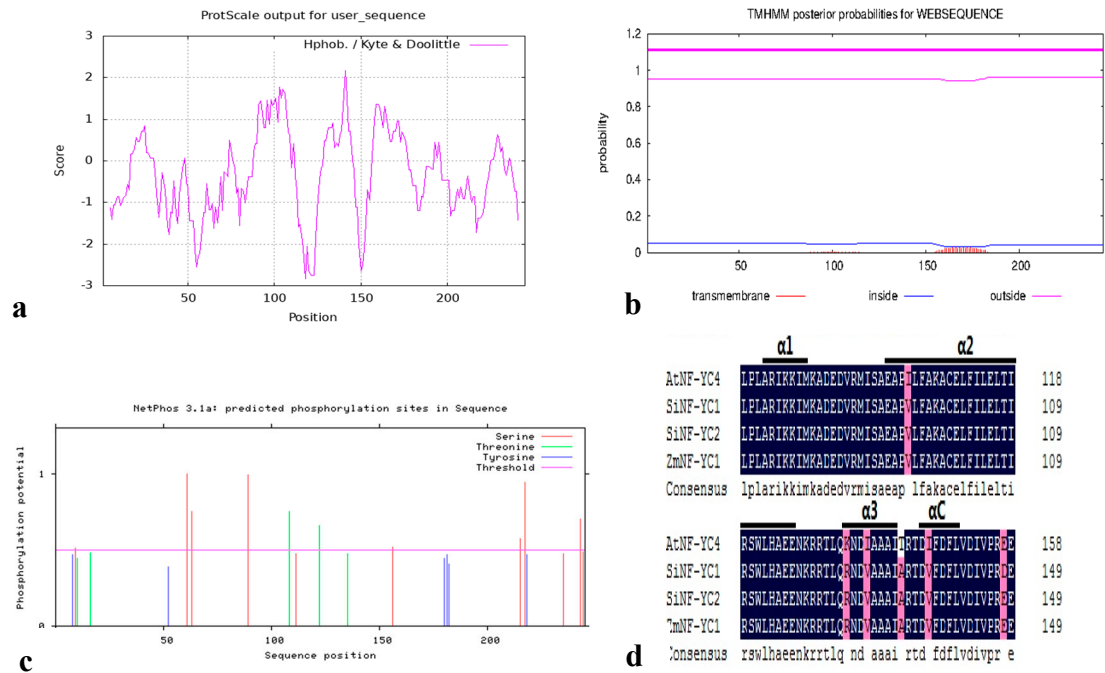

**Figure S1.** Bioinformatics analysis of *SiNF-YC2*. **(a)** Protein affinity / hydrophobicity analysis. **(b)** Transmembrane structure prediction. **(c)** Prediction of protein phosphorylation sites. **(d)** Amino acid sequence alignment of *SiNF-YC2*. Pink indicates the sequence difference sites.
